# Supplementary material for: Association of the Healthy Beverage Index With Metabolic Syndrome and Stroke in U.S. Adults: The National Health and Nutrition Examination Survey 2013-2014
Source: Research Square preprint supplement (doi:10.21203/rs.3.rs-936654/v1), 2021-10-05

**Additional file 2: Figure S1**


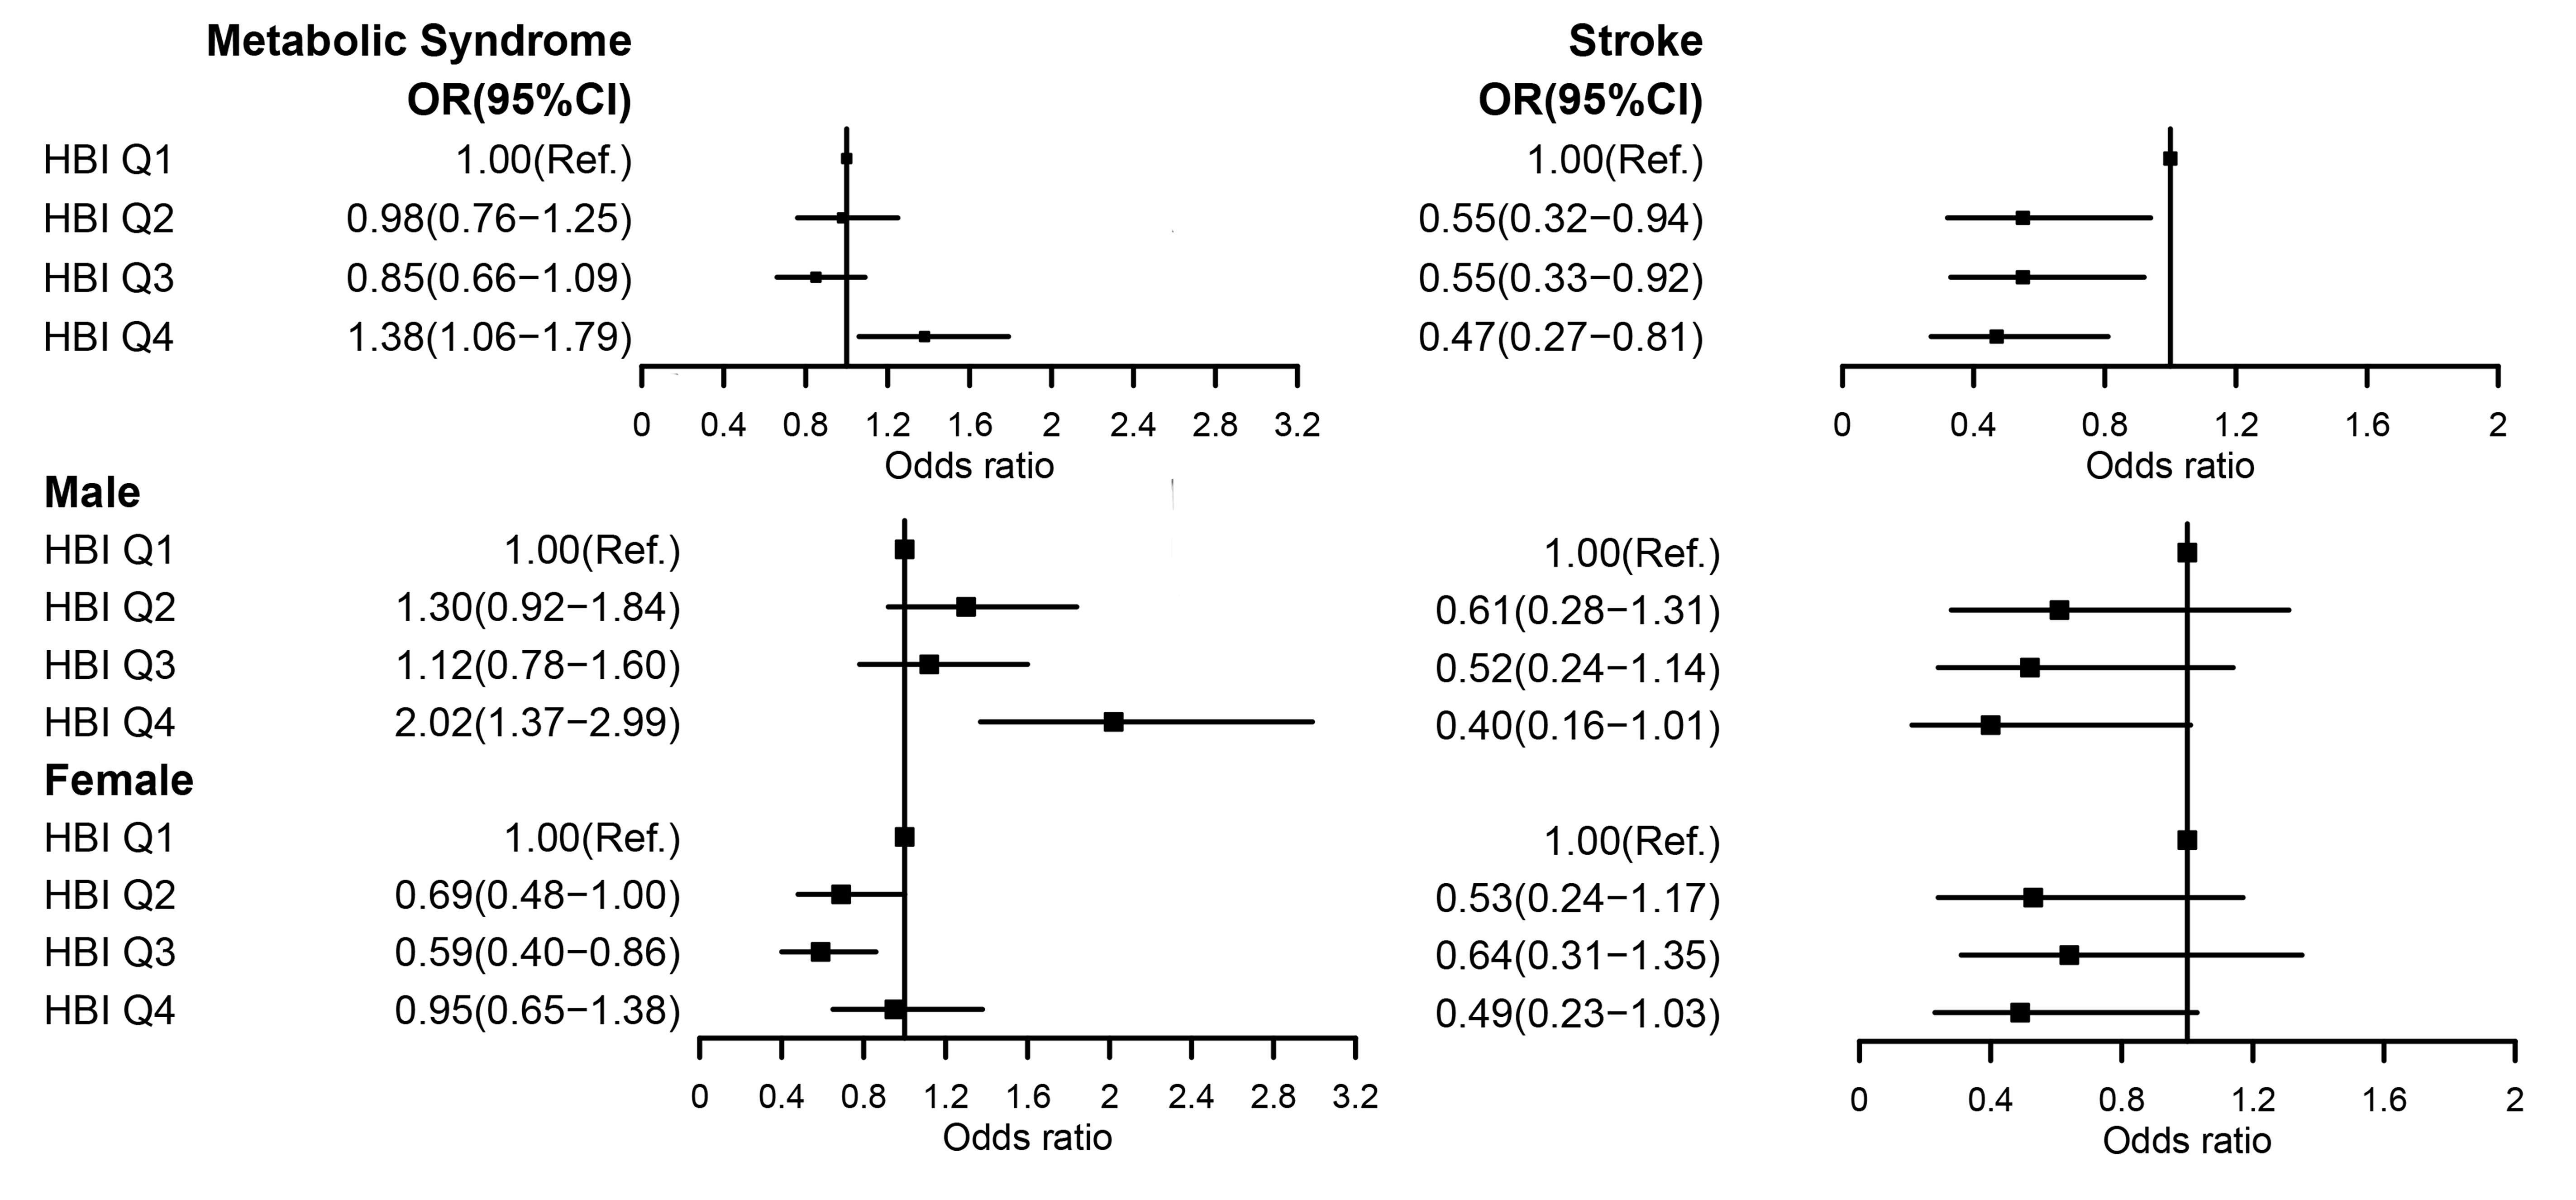


**Additional file 2: Figure S2**


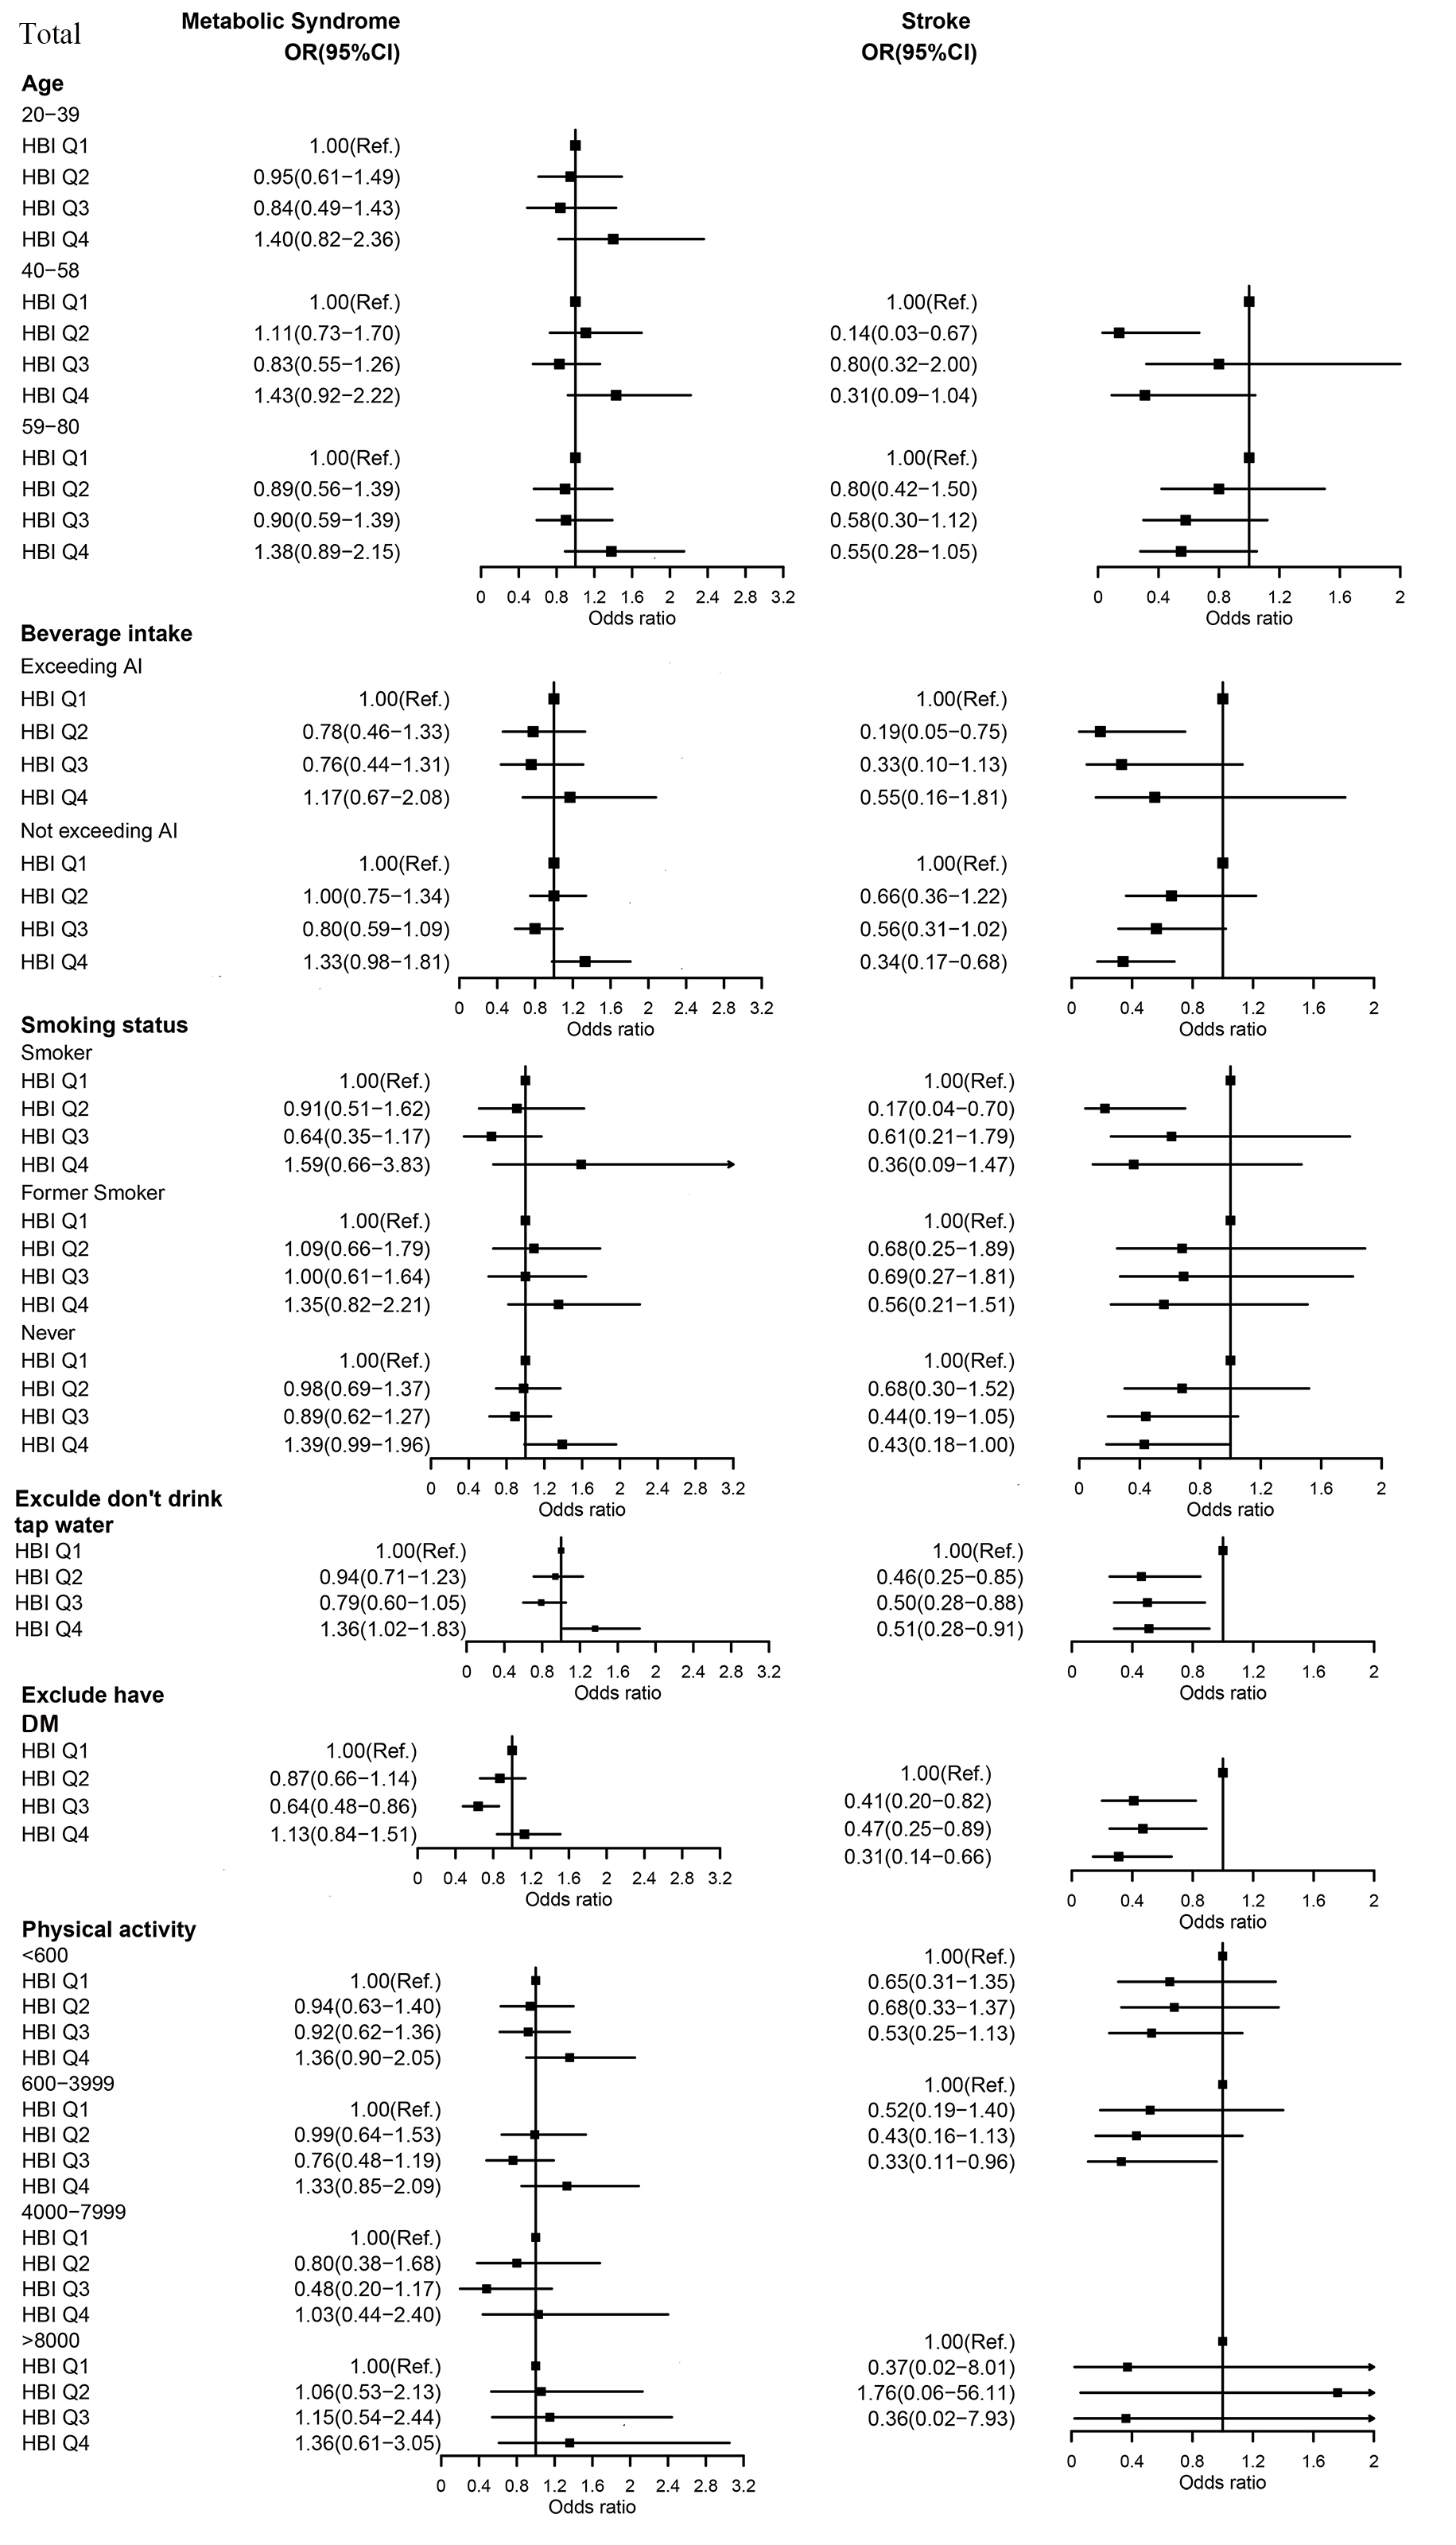


**Additional file 2: Figure S3**


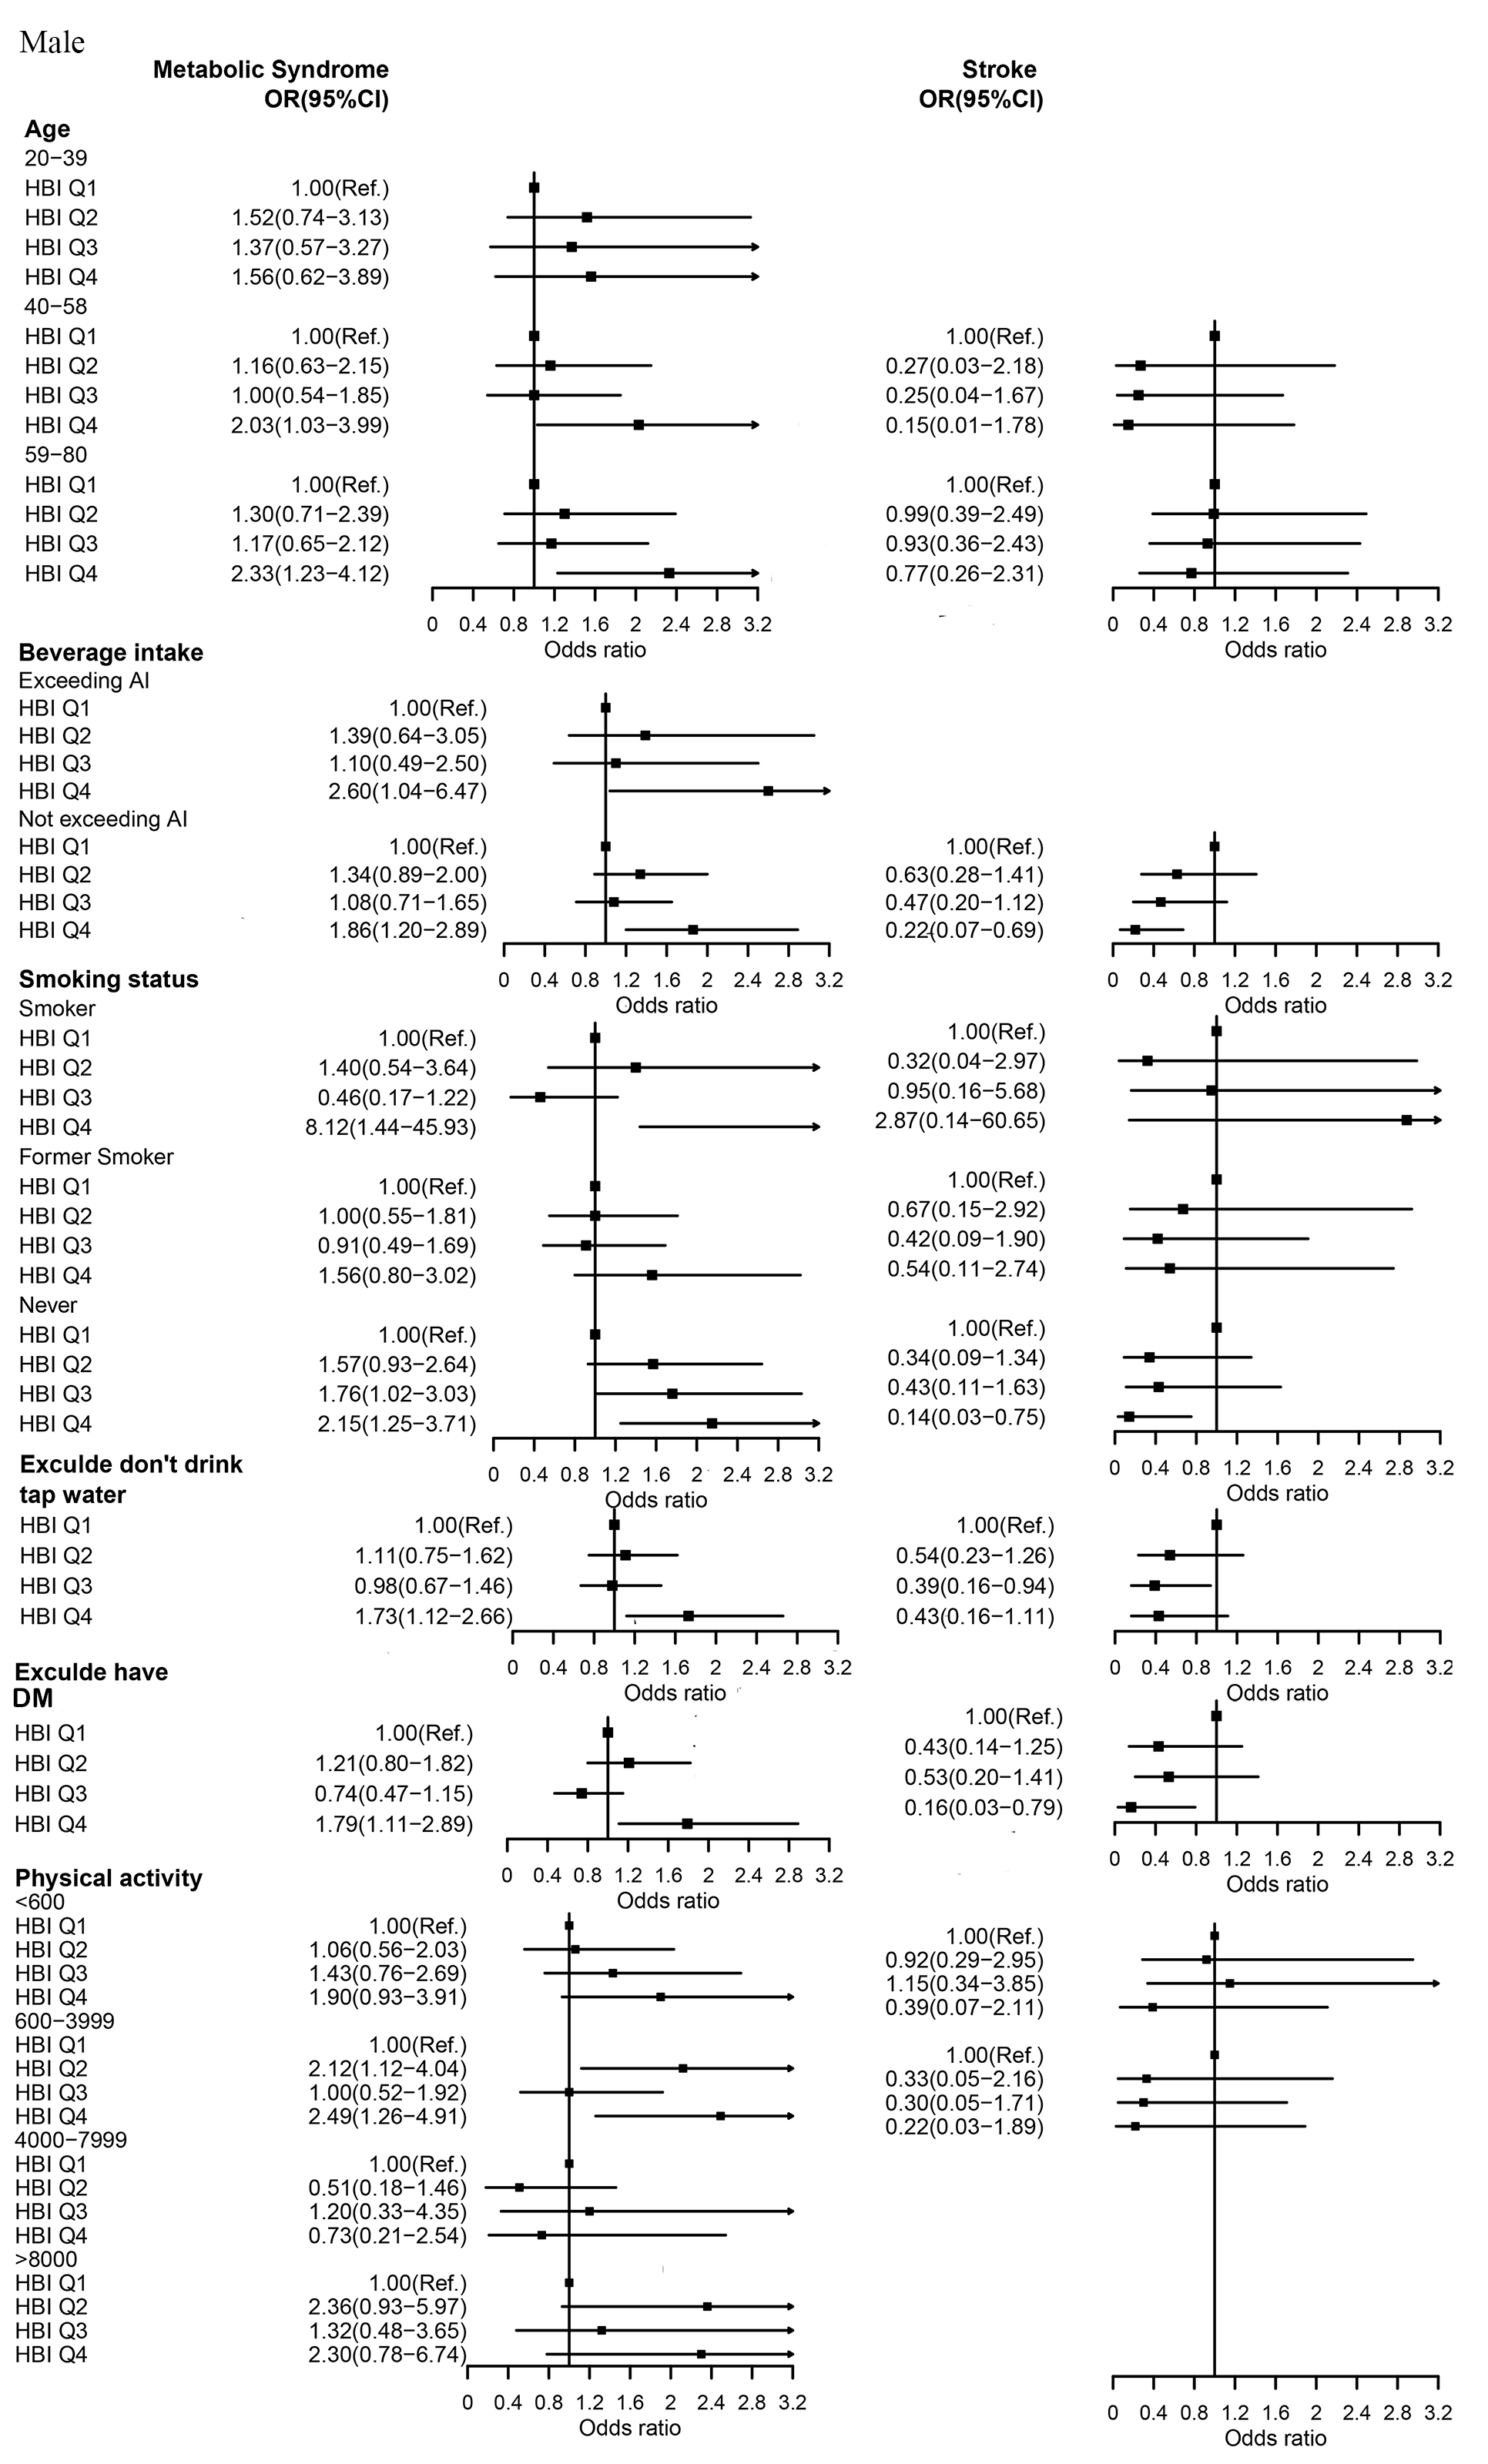


**Additional file 2: Figure S4**


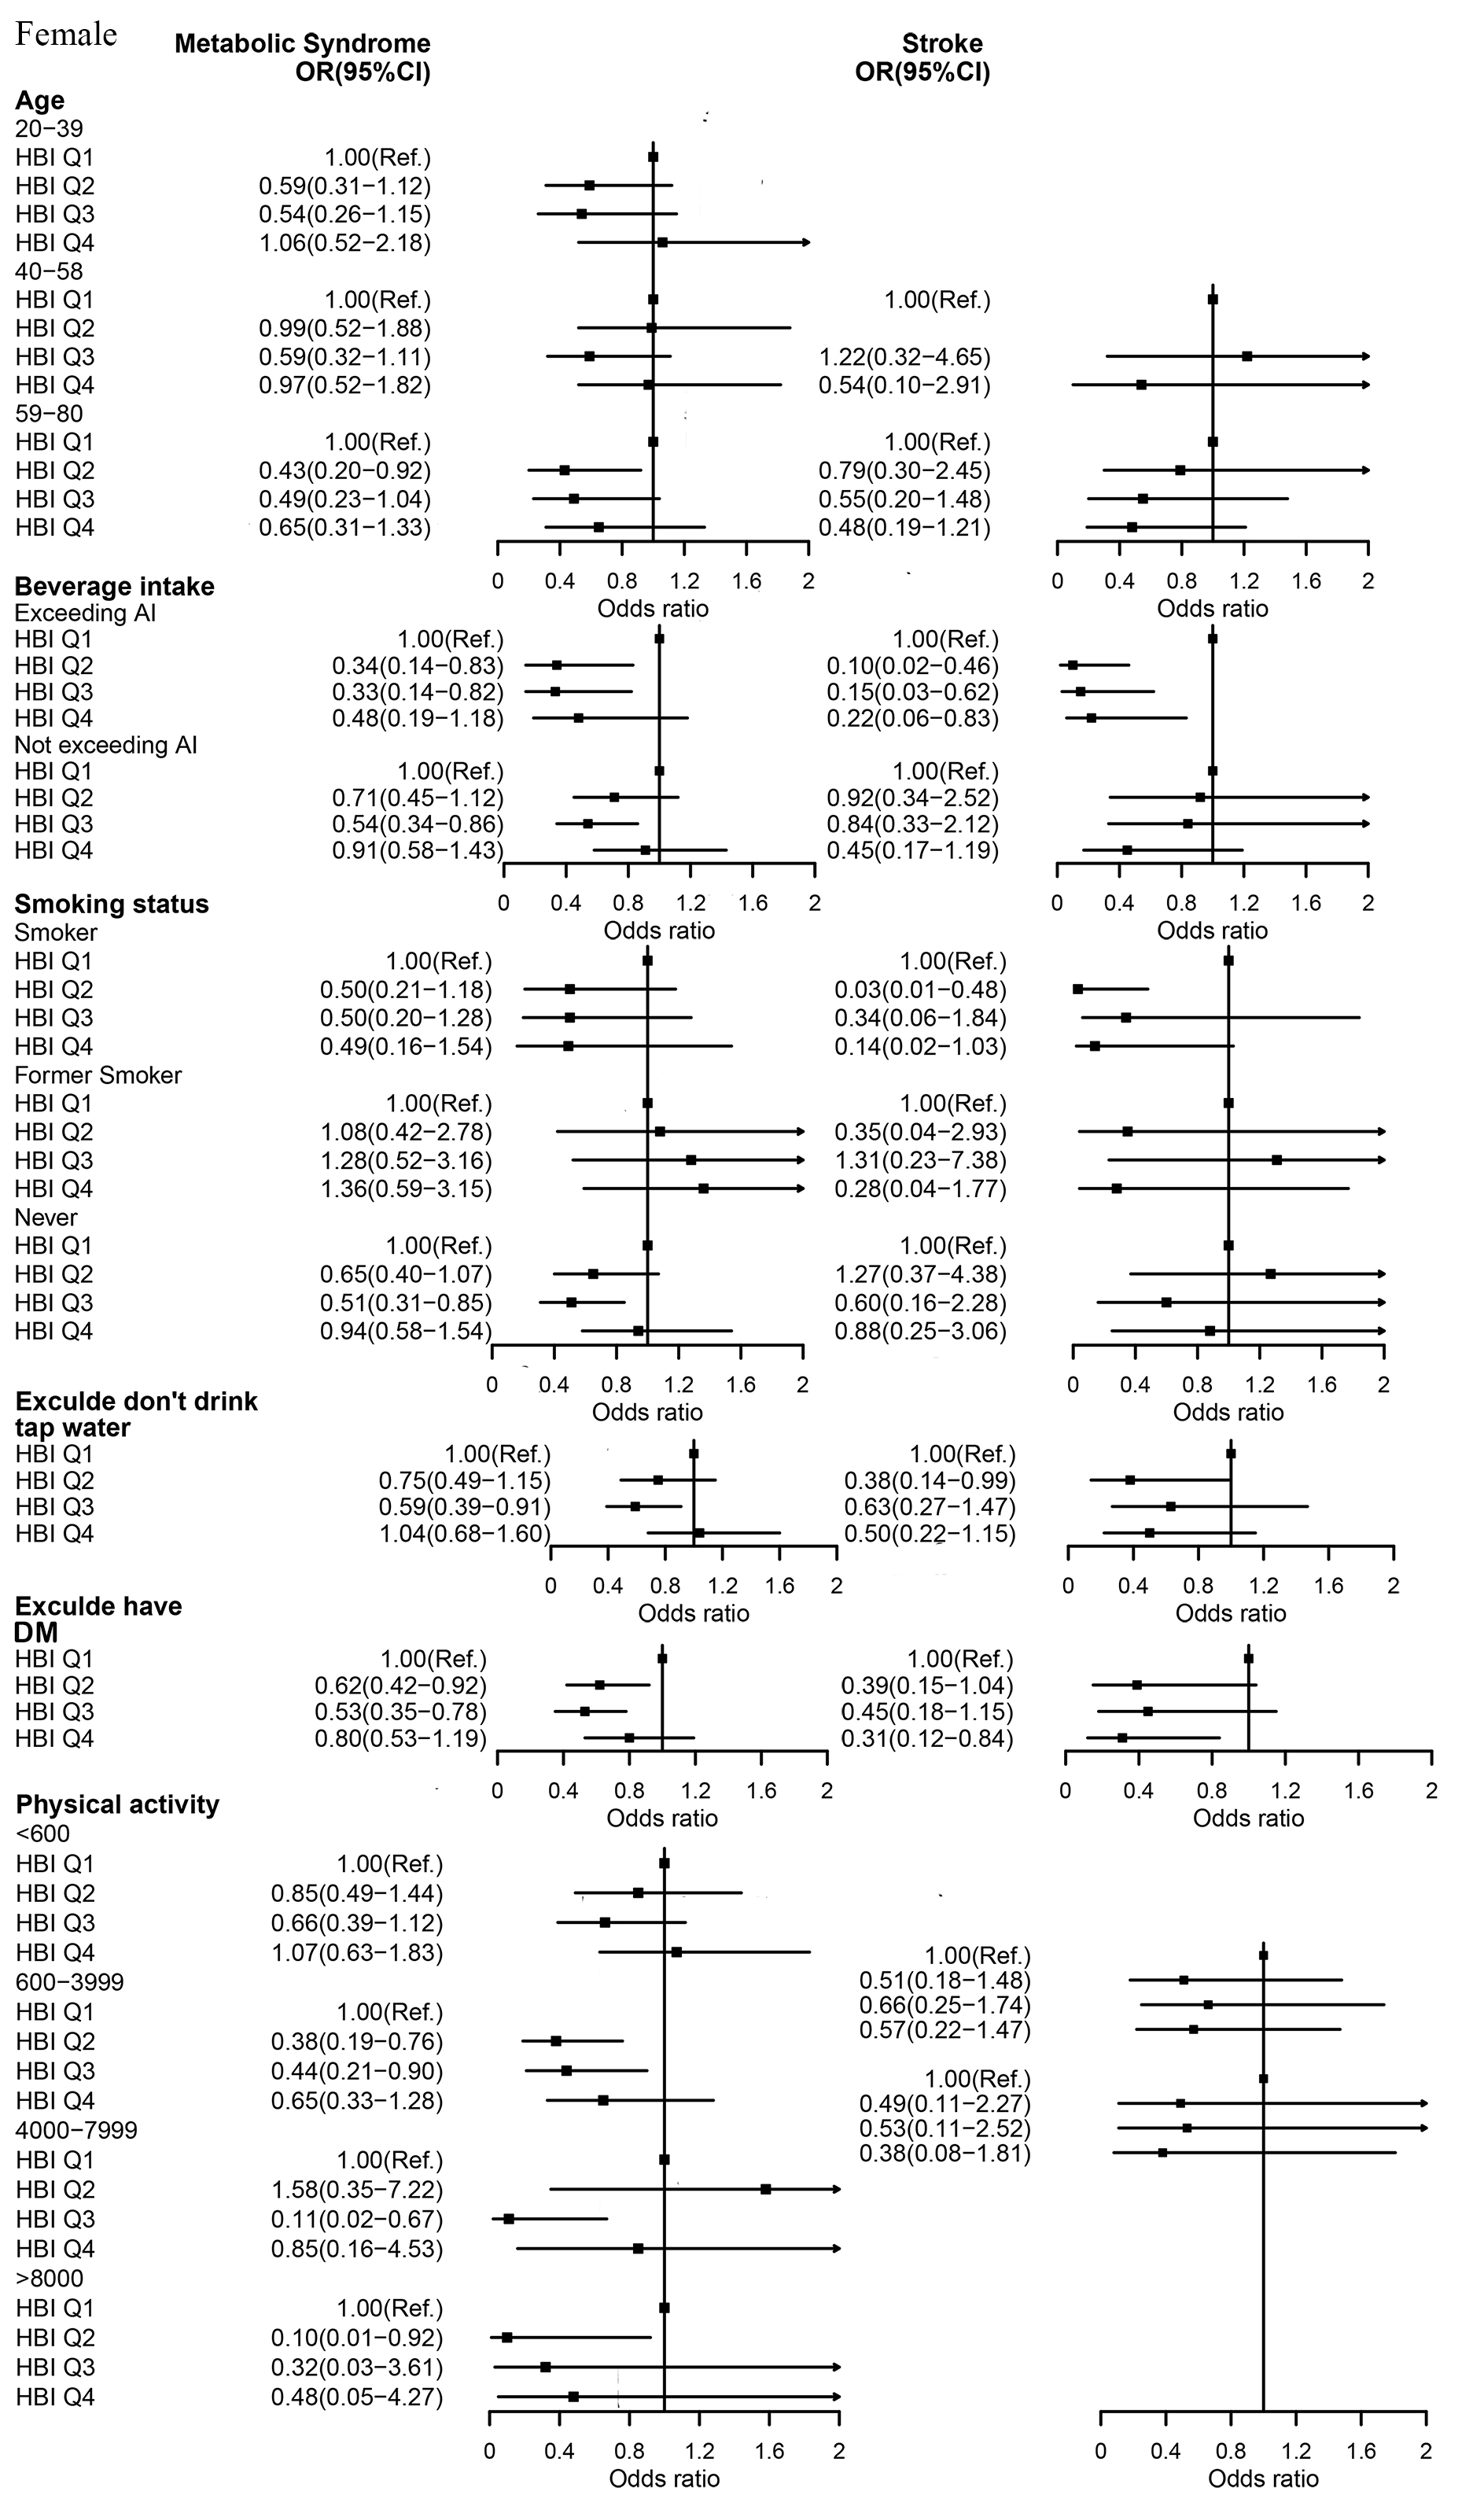

Supplement: Supplementary file 1 [file d4ece1697c6a5609d723397e.docx]
